# Supplementary material for: Effect of Temperature on the Adhesion and Bactericidal Activities of Ag+-Doped BiVO4 Ceramic Tiles
Source: MDPI journal article supplement (doi:10.3390/inorganics10050061), 2022-05-06
Supplement: s1 [file s1]

## Supplementary Information

### Effect of temperature on the adhesion and sterilization effect of Ag<sup>+</sup>- doped BiVO<sub>4</sub> ceramic tiles

Ying Zhang<sup>1</sup>, Xuhuan Zhao<sup>1</sup>, Hao Wang<sup>3</sup>, Shiqi Fu<sup>1</sup>, Xiulong Lv<sup>1</sup>, Qian He<sup>1</sup>, Rui Liu<sup>2</sup>,  
Fangying Ji<sup>1, \*</sup>, Xuan Xu<sup>1, \*\*</sup>

1. Key Laboratory of Three Gorges Reservoir Region's Eco-Environment, Ministry of Education, Chongqing University, Chongqing, 400045, China
2. Yunnan Ribo Testing Technology Co., Ltd. Yunnan, 650101, China
3. Piesat Information Technology Co.,Ltd. Beijing, 100195, China

---

\* Corresponding author. E-mail: jfy@cqu.edu.cn (Fangying Ji)

\*\* Corresponding author. E-mail: xuxuan@cqu.edu.cn (Xuan Xu)

## Table of Contents

Figure S1 The effect of Ag dosage on the sterilization effect of Ag/BiVO<sub>4</sub> obtained at 450 °C (bacterial suspension concentration:  $1 \times 10^6$  CFU/mL; bacterial species: *Escherichia coli*; common anions: 0.9% Cl<sup>-</sup>).

Figure S2. Standard curve of bacteria suspension concentration vs. absorbance (wavelength: 600 nm)

Figure S3. XPS spectra of BiVO<sub>4</sub> and Ag/BiVO<sub>4</sub> powder (prepared temperature: 450 °C): (a) Full-scan spectra of BiVO<sub>4</sub> and Ag/BiVO<sub>4</sub>; (b-e) peak positions of Ag, O, V, and Bi species.

Figure S4. (a) UV-Vis spectra of samples prepared at 450 °C; (b) band gap widths of the samples prepared at 450 °C.

Figure S5 *Escherichia coli* sterilization efficiency of Ag/BiVO<sub>4</sub> ceramic tiles after scratch tests (bacterial suspension concentration:  $1 \times 10^6$  CFU/mL; common anions: 0.9% Cl<sup>-</sup>).

Figure S6. SEM cross-section image of Ag/BiVO<sub>4</sub> coating obtained at 650 °C

Figure S7. AFM images of (a-b) BiVO<sub>4</sub> and (c-d) Ag/BiVO<sub>4</sub>-functionalized ceramic tiles annealed at 450 °C.

Figure S8. AFM images of (a-b) BiVO<sub>4</sub> and (c-d) Ag/BiVO<sub>4</sub>-functionalized ceramic tiles annealed at 550 °C.

Figure S9. AFM images of (a-b) BiVO<sub>4</sub> and (c-d) Ag/BiVO<sub>4</sub>-functionalized ceramic tiles annealed at 650 °C.

Figure S10 (a-c) SEM images of BiVO<sub>4</sub> and (d-f) Ag/BiVO<sub>4</sub> powders at 450 °C

Figure S11. Grain size distribution of BiVO<sub>4</sub> and (a) Ag/BiVO<sub>4</sub> (b) powder obtained at 450 °C

Figure S12 Concentration of Ag<sup>+</sup> released from of Ag/BiVO<sub>4</sub>-functionalized ceramic tiles annealed at 650 °C.

Table S1 The basic characteristics of glazed ceramic tiles (model number: 630ELN52005-A)

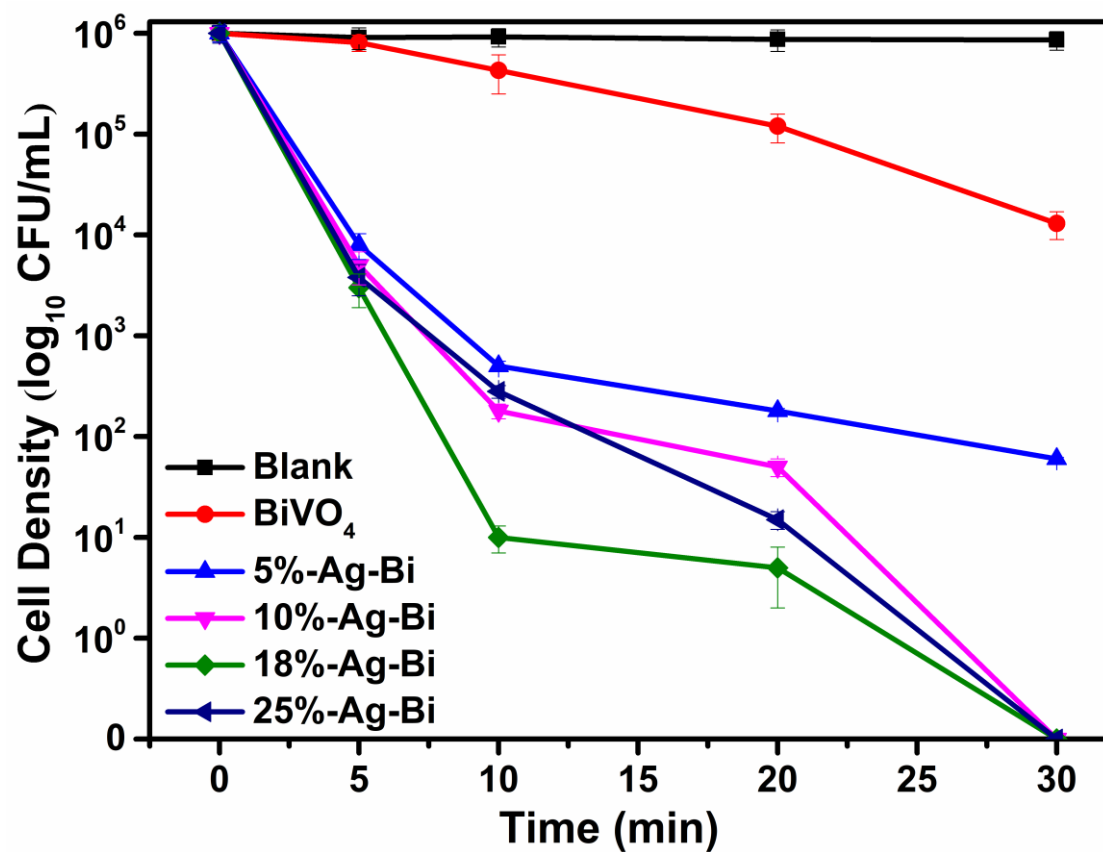

Figure S1. The effect of Ag dosage on the sterilization effect of Ag/BiVO<sub>4</sub> obtained at 450 °C (bacterial suspension concentration:  $1 \times 10^6$  CFU/mL; bacterial species: *Escherichia coli*; common anions: 0.9% Cl<sup>-</sup>).

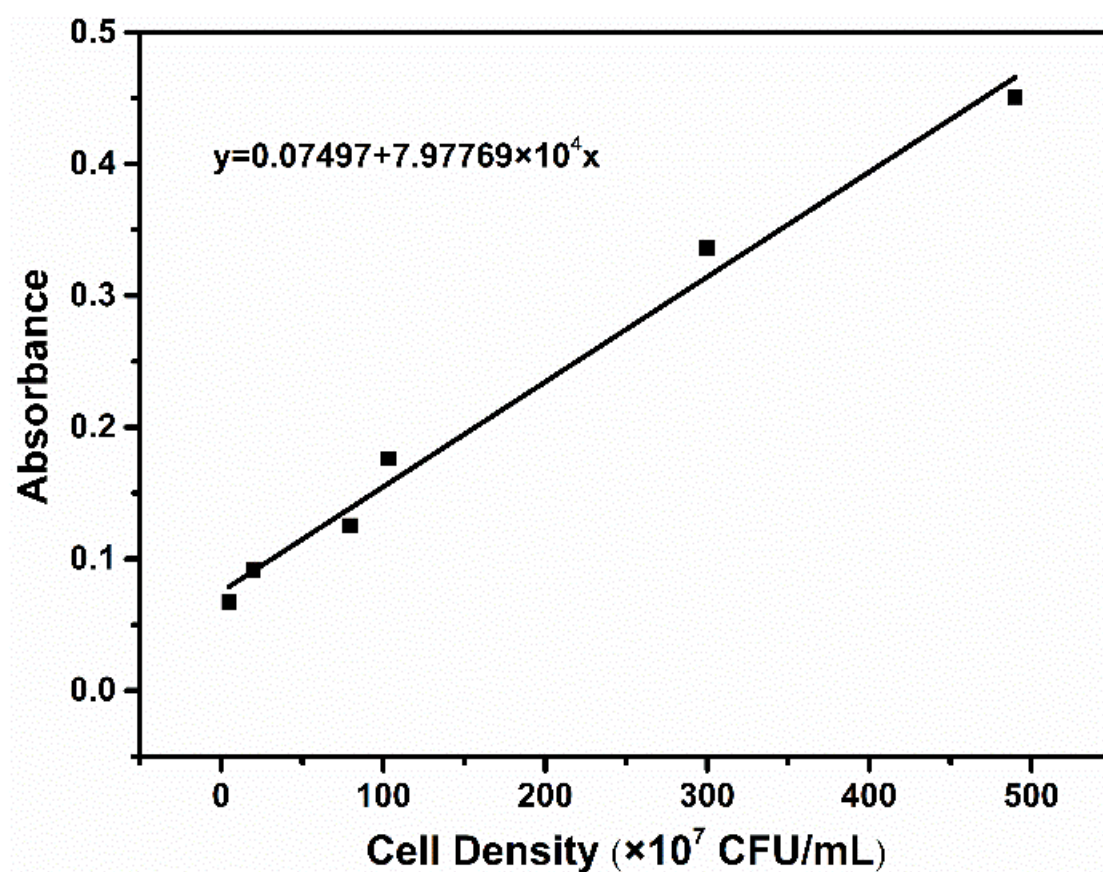

Figure S2. Standard curve of bacteria suspension concentration vs. absorbance

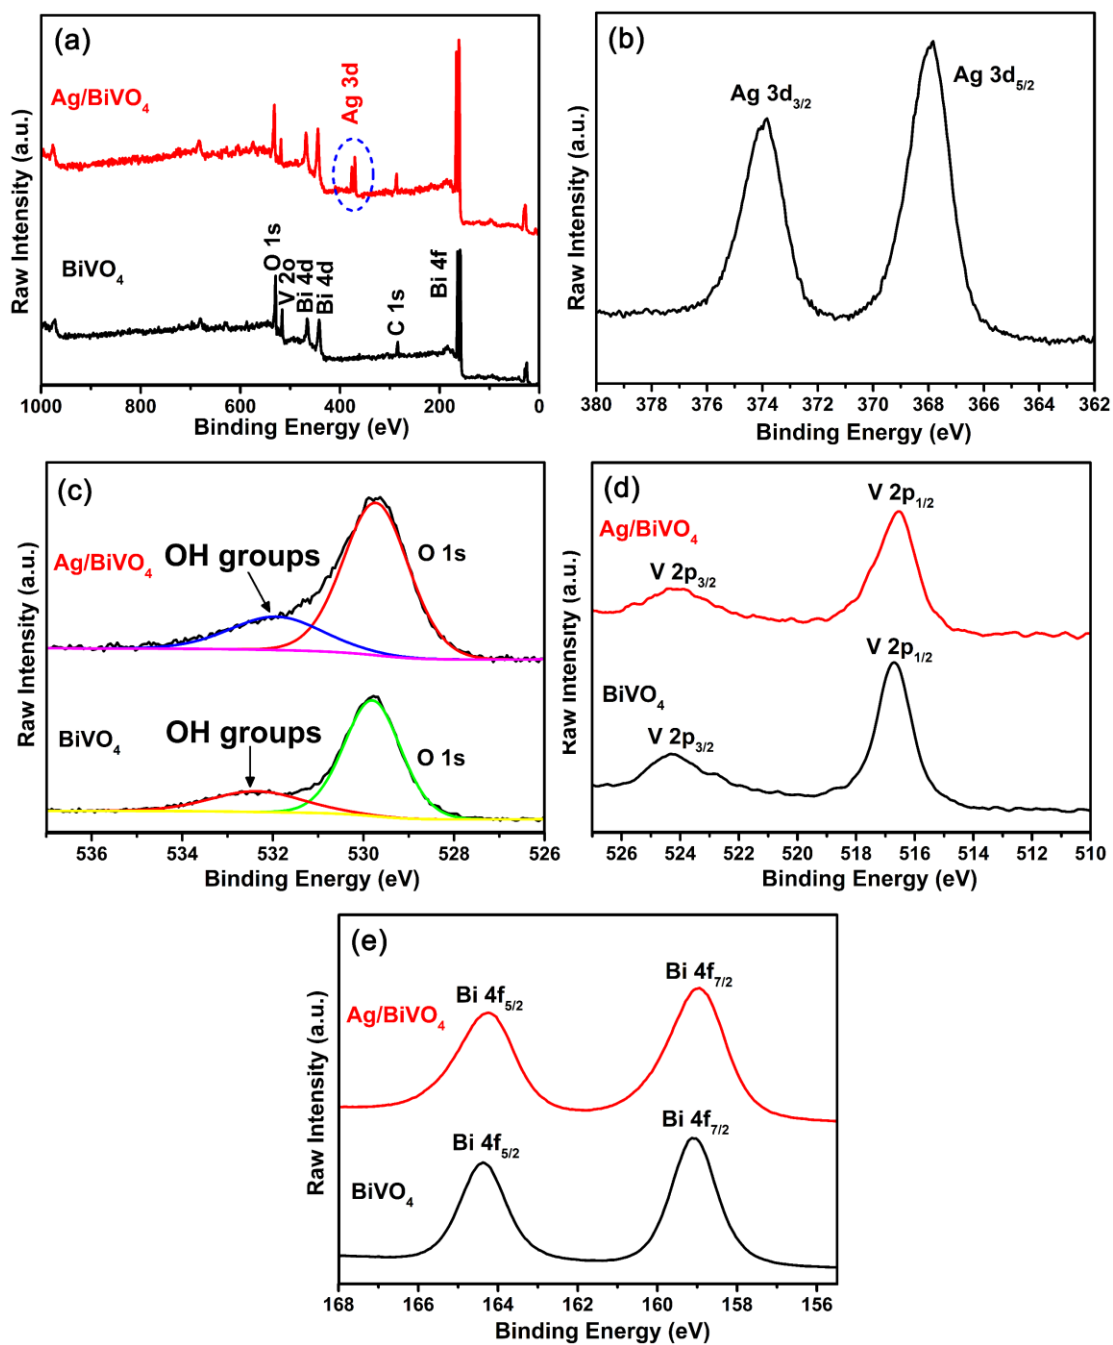

Figure S3. XPS spectra of  $\text{BiVO}_4$  and  $\text{Ag/BiVO}_4$  powder (prepared temperature: 450 °C). (a) Full-scan spectra of  $\text{BiVO}_4$  and  $\text{Ag/BiVO}_4$ ; (b-e) peak positions of Ag, O, V, and Bi species.

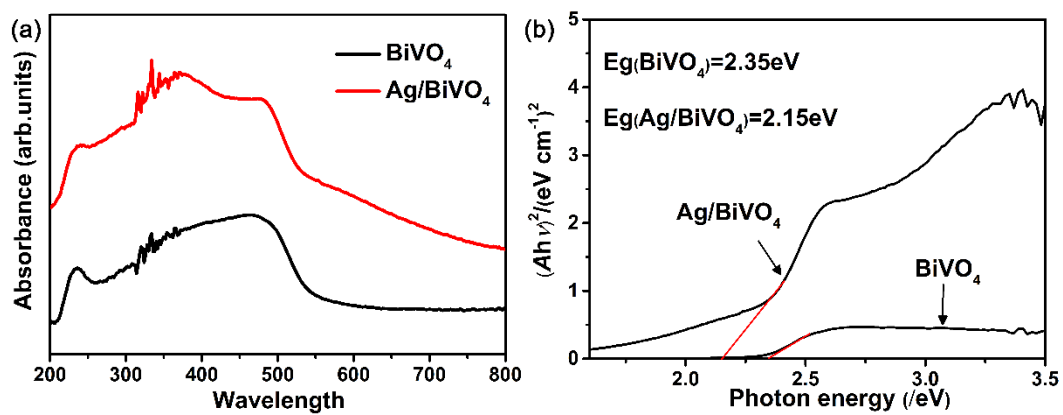

Figure S4. (a) UV-Vis spectra of the samples (prepared temperature: 450 °C); (b) Band gap widths of the samples (prepared temperature: 450 °C).

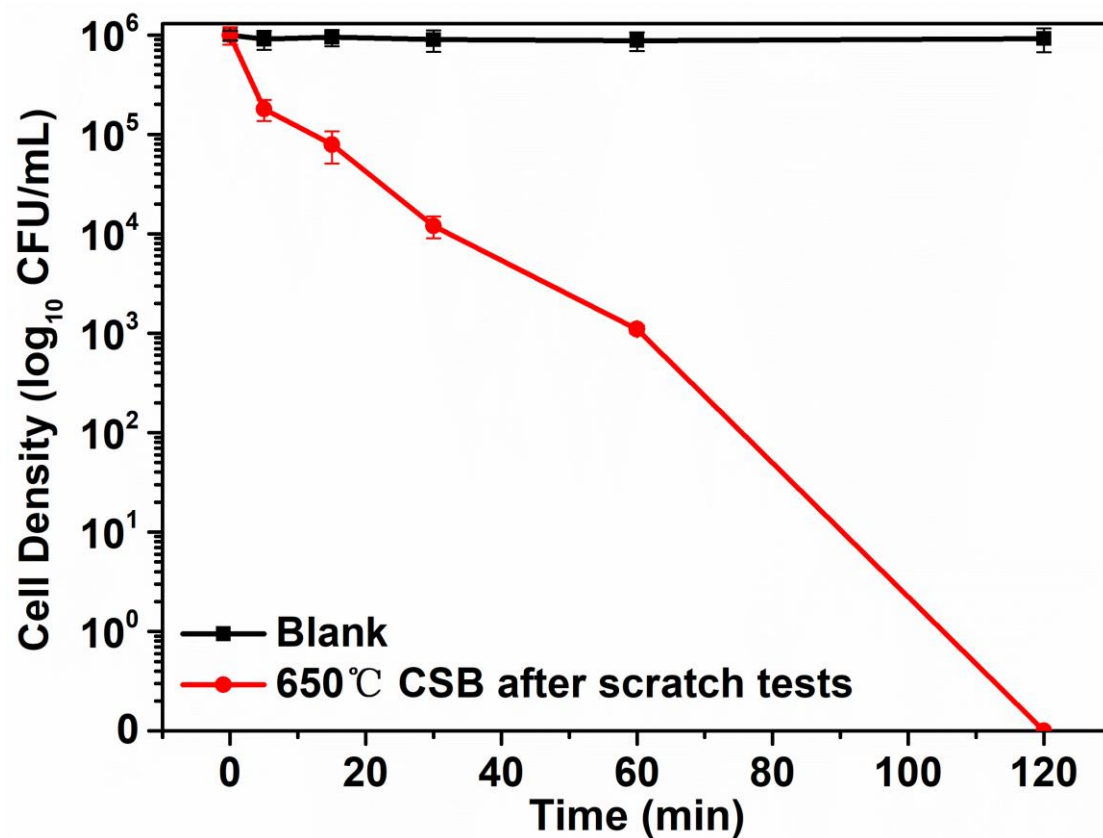

Figure S5 *Escherichia coli* sterilization efficiency of Ag/BiVO<sub>4</sub> ceramic tiles after scratch tests (bacterial suspension concentration:  $1 \times 10^6$  CFU/mL; common anions: 0.9% Cl<sup>-</sup>).

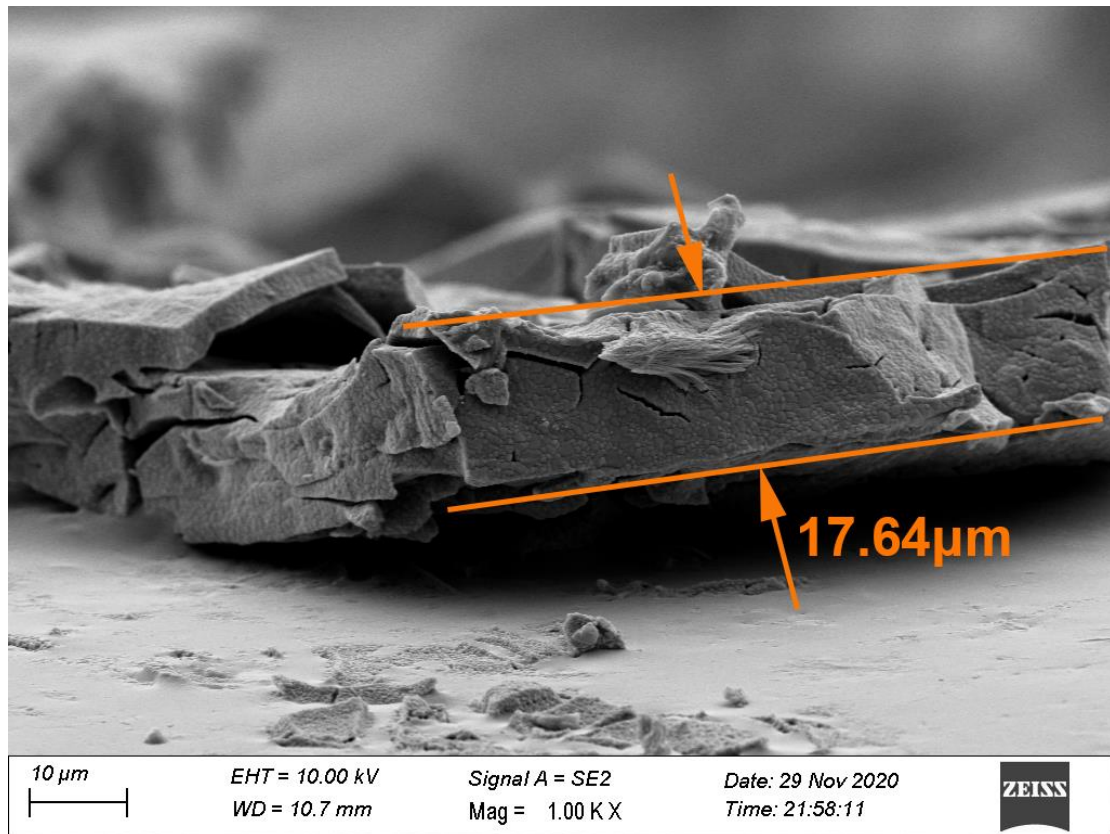

Figure S6. SEM cross section image of Ag/BiVO<sub>4</sub> coating obtained at 650 °C.



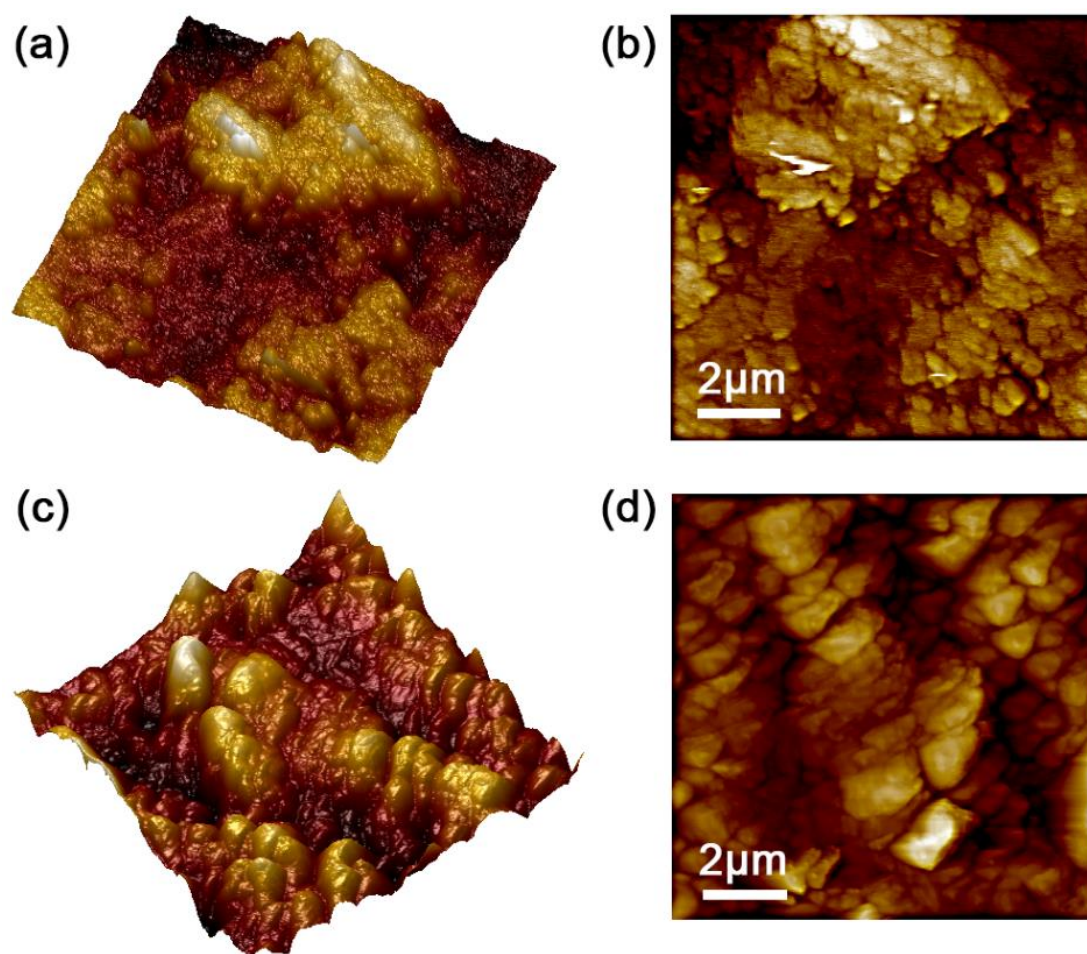

Figure S7. AFM images of (a-b)  $\text{BiVO}_4$  and (c-d)  $\text{Ag/BiVO}_4$  functionalized ceramic tiles annealed at  $450\text{ }^\circ\text{C}$ .

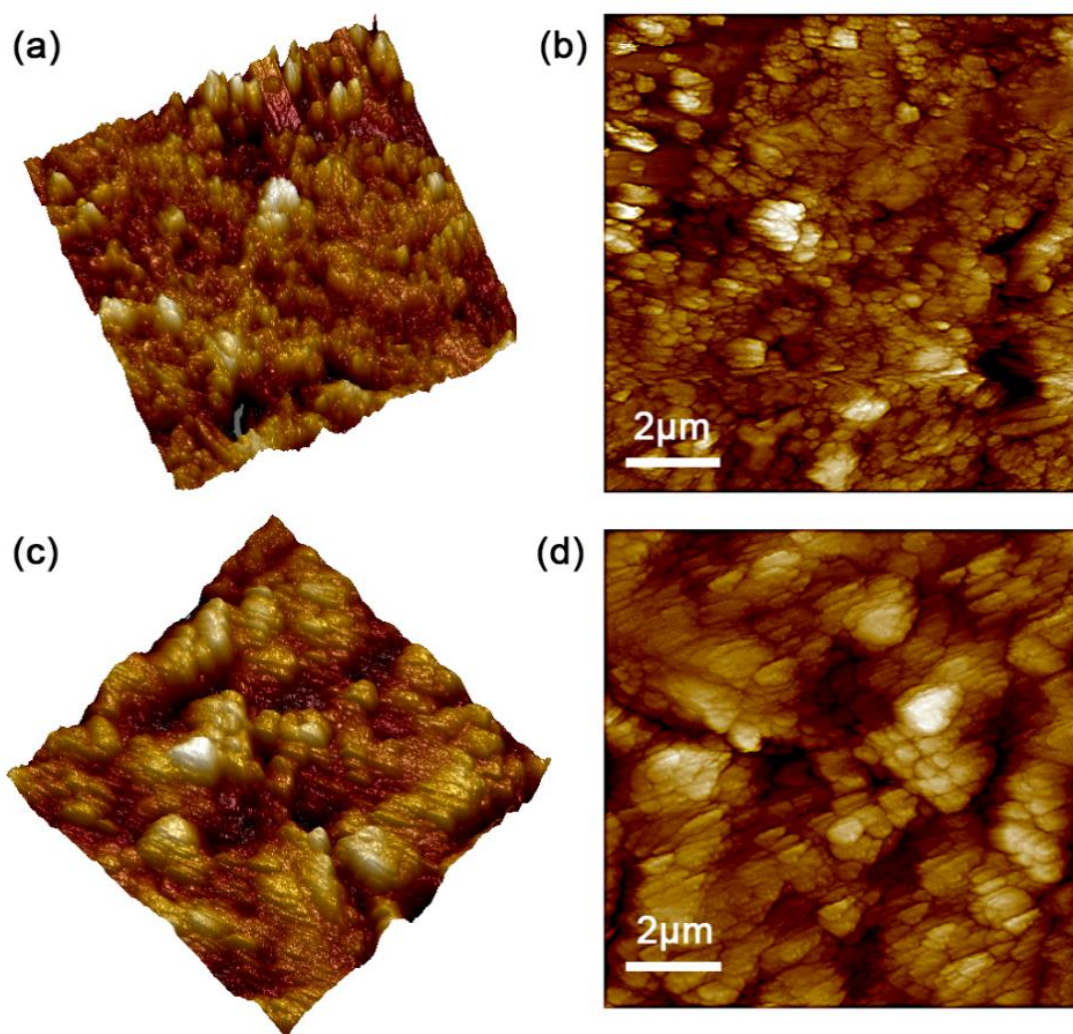

Figure S8. AFM images of (a-b)  $\text{BiVO}_4$  and (c-d)  $\text{Ag/BiVO}_4$  functionalized ceramic tiles annealed at 550 °C.

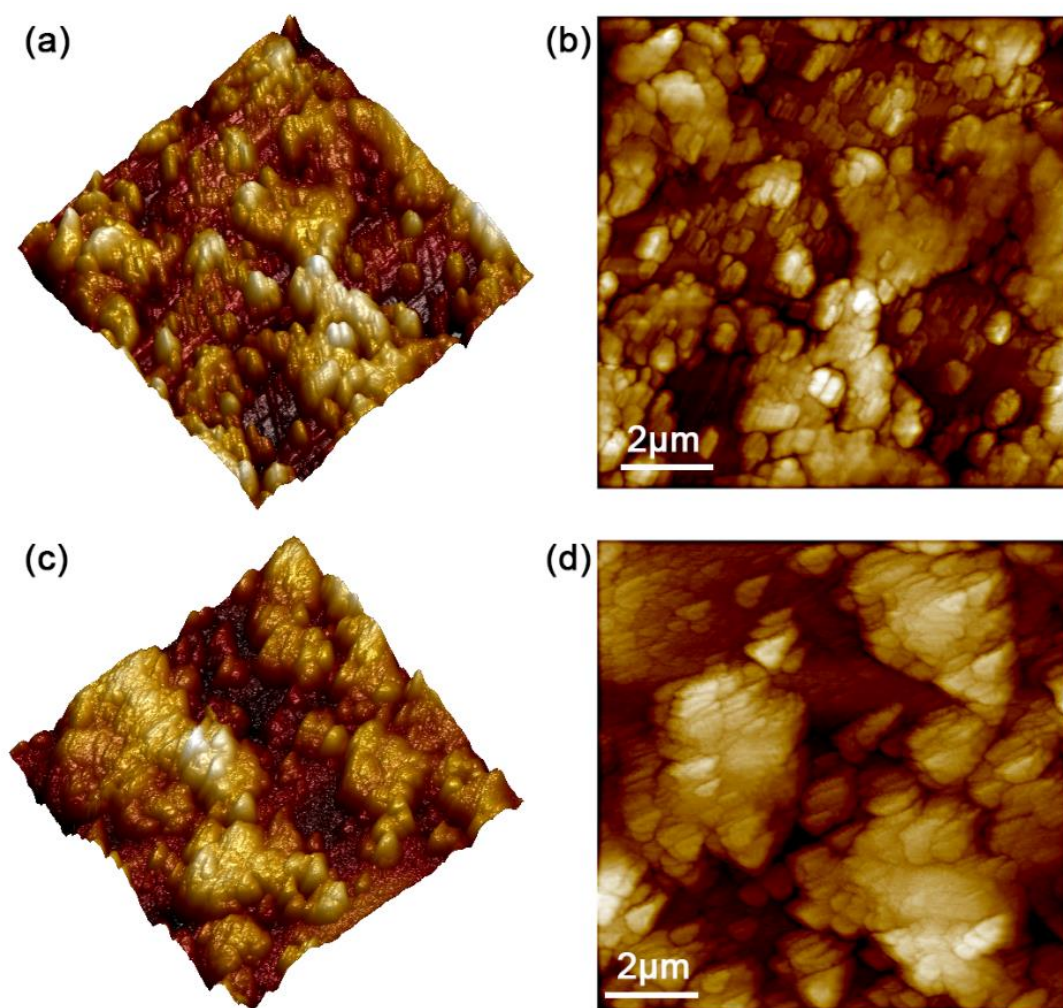

Figure S9. AFM images of (a-b)  $\text{BiVO}_4$  and (c-d) AFM images of Ag/ $\text{BiVO}_4$  functionalized ceramic tiles annealed at 650 °C.

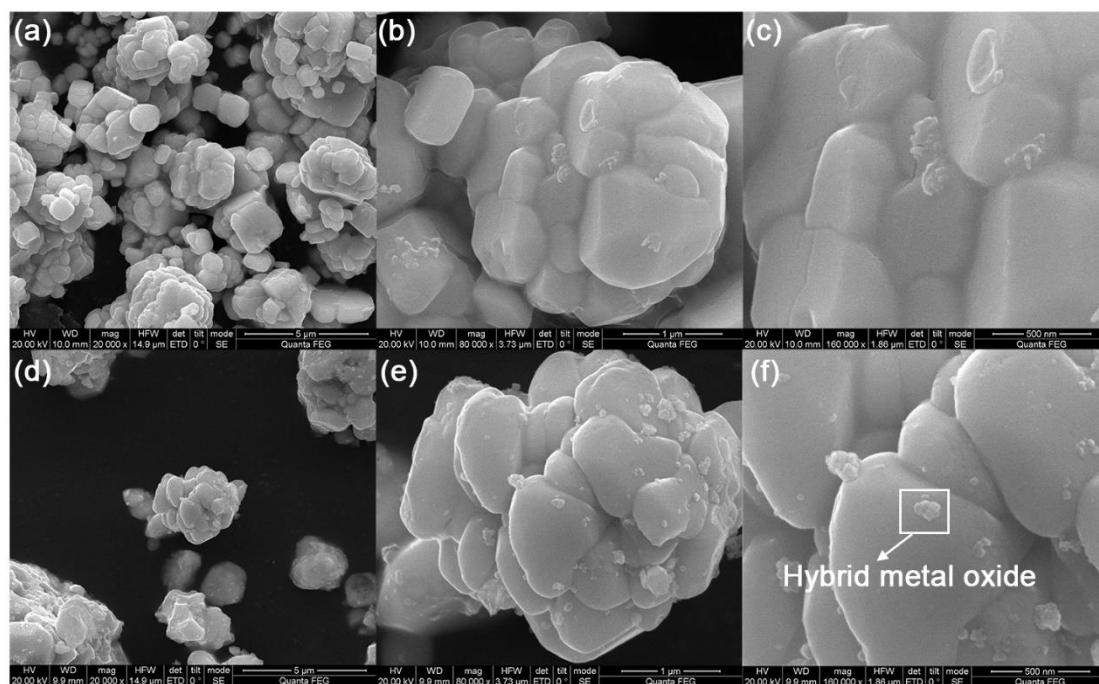

Figure S10. (a-c) SEM images of BiVO<sub>4</sub> and (d-f) Ag/BiVO<sub>4</sub> powders at 450°C



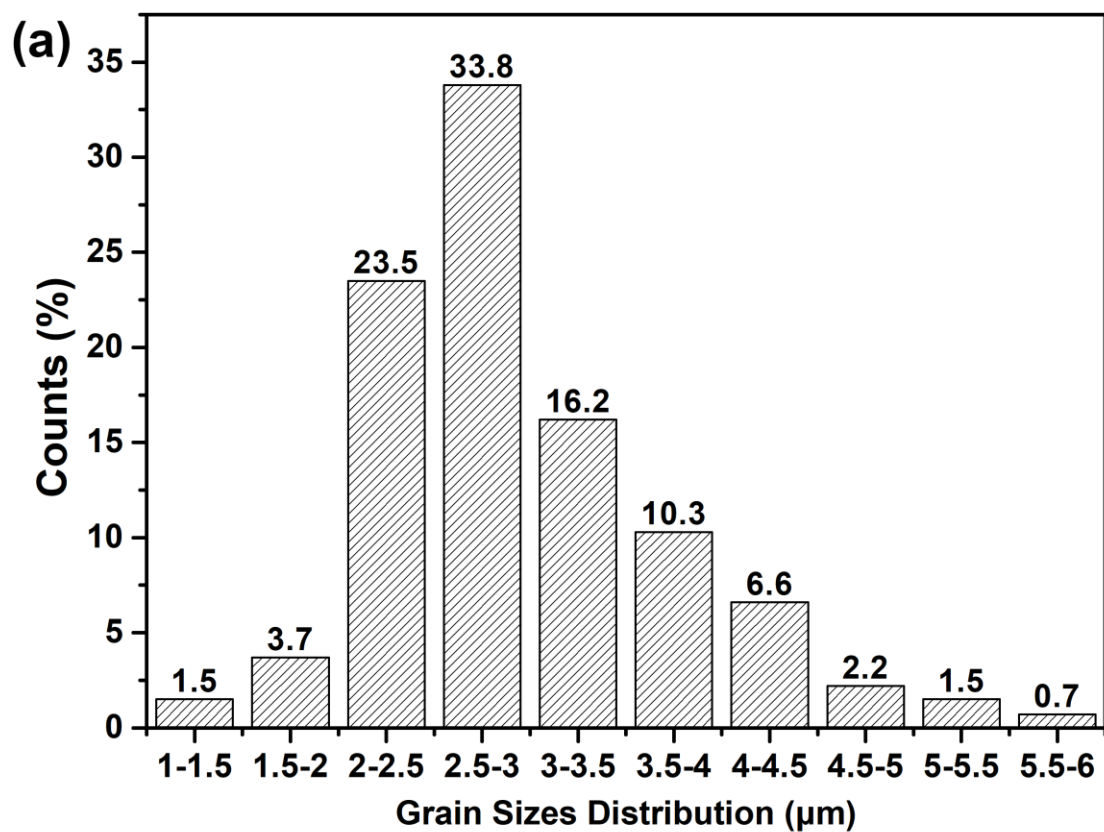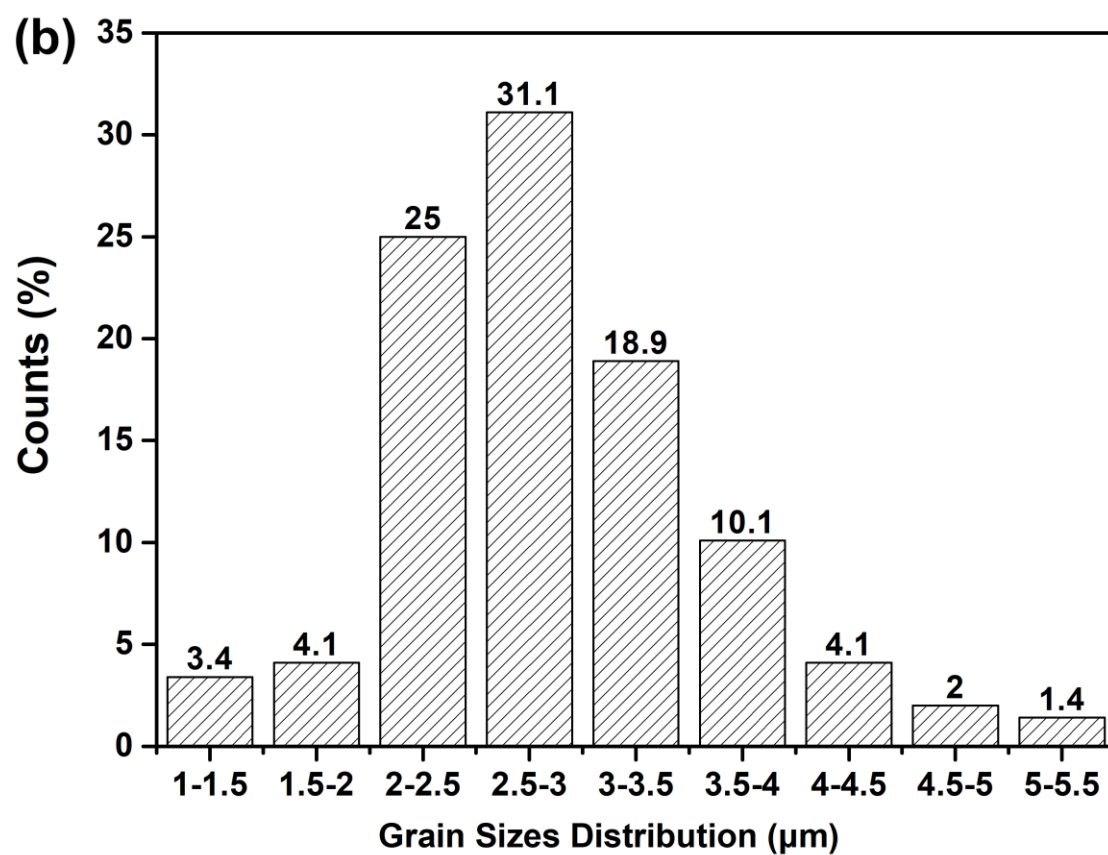

Figure S11. Grain sizes distribution of  $\text{BiVO}_4$  and (a)  $\text{Ag/BiVO}_4$  (b) powder obtained at  $450^\circ\text{C}$

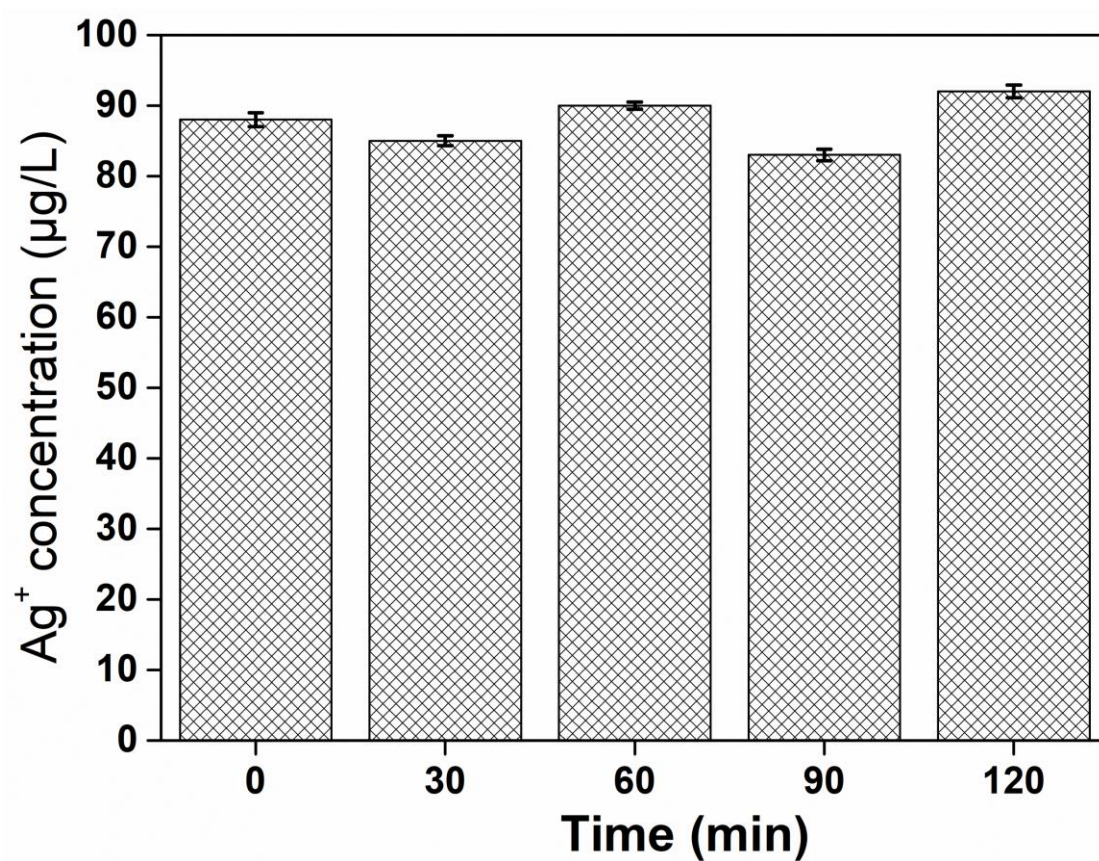

Figure S12. Concentration of released  $\text{Ag}^+$  from of Ag/BiVO<sub>4</sub> functionalized ceramic tiles annealed at 650 °C.

Table S1 The basic characteristics of glazed ceramic tiles (model number: 630ELN52005-A)

| Technical parameter                                                             | Unit               | Value           |
|---------------------------------------------------------------------------------|--------------------|-----------------|
| Nominal size                                                                    | mm                 | 600×300         |
| Thickness                                                                       | mm                 | 10±0.3          |
| Water absorption                                                                | %                  | 5               |
| Breakage pressure                                                               | N                  | 1144            |
| Modulus of rupture                                                              | MPa                | 23              |
| Moisture expansion                                                              | mm/m               | 0.19            |
| The amount of dissolved lead<br>(Detection limit: 0.005 mg/dm <sup>2</sup> )    | mg/dm <sup>2</sup> | Not detected    |
| The amount of dissolved cadmium<br>(Detection limit: 0.003 mg/dm <sup>2</sup> ) | mg/dm <sup>2</sup> | Not detected    |
| Surface flatness                                                                | /                  | -0.05% ~ +0.04% |
